# Supplementary material for: The Root Nodule Microbiome of Cultivated and Wild Halophytic Legumes Showed Similar Diversity but Distinct Community Structure in Yellow River Delta Saline Soils
Source: PubMed Central journal article supplement (PMC7074777; doi:10.3390/microorganisms8020207), 2020-02-03
Supplement: microorganisms-08-00207-s001.pdf [file microorganisms-08-00207-s001.pdf]

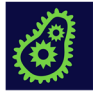

## Supplementary Materials

# The root nodule microbiome of cultivated and wild halophytic legumes showed similar diversity but distinct community structure in Yellow River Delta saline soils

Yanfen Zheng <sup>1†</sup>, Jing Liang <sup>1,2†</sup>, Dong-Lin Zhao <sup>1</sup>, Chen Meng <sup>1,2</sup>, Zong-Chang Xu <sup>1,2</sup>, Zhi-Hong Xie <sup>3,\*</sup>, Cheng-Sheng Zhang <sup>1,2,\*</sup>

<sup>1</sup> Marine Agriculture Research Center, Tobacco Research Institute of Chinese Academy of Agricultural Sciences, Qingdao, 266101, China; [zhaodonglin@caas.cn](mailto:zhaodonglin@caas.cn) (D.-L.Z.); [zhengyanfen@caas.cn](mailto:zhengyanfen@caas.cn) (Y.Z.); [13739089026@163.com](mailto:13739089026@163.com) (J.L.); [mengchen01@caas.cn](mailto:mengchen01@caas.cn) (C.M.); [xuzongchang@caas.cn](mailto:xuzongchang@caas.cn) (Z.-C.X.); [zhchengsheng@126.com](mailto:zhchengsheng@126.com) (C.-S.Z.)

<sup>2</sup> Special Crops Research Center of Chinese Academy of Agricultural Sciences, Qingdao, 266101, China; [13739089026@163.com](mailto:13739089026@163.com) (J.L.); [mengchen01@caas.cn](mailto:mengchen01@caas.cn) (C.M.); [xuzongchang@caas.cn](mailto:xuzongchang@caas.cn) (Z.-C.X.); [zhchengsheng@126.com](mailto:zhchengsheng@126.com) (C.-S.Z.)

<sup>3</sup> Yantai Institute of Coastal Zone Research, Chinese Academy of Sciences, Yantai, 264003, China; [zhxie@yic.ac.cn](mailto:zhxie@yic.ac.cn)

†These authors contributed equally to this work

\*Correspondence: [zhchengsheng@126.com](mailto:zhchengsheng@126.com); Tel.: +86-0532-8870-2115; [zhxie@yic.ac.cn](mailto:zhxie@yic.ac.cn)

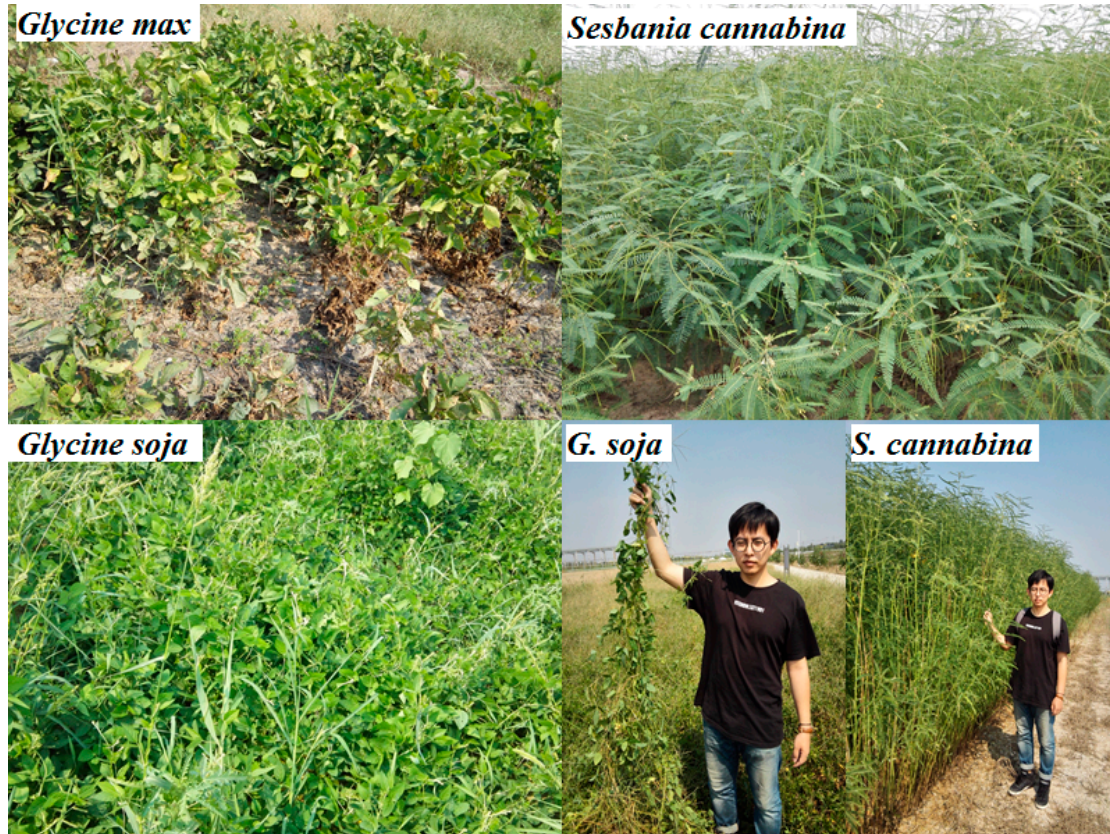

**Figure S1: Investigations of the growth of *S. cannabina*, *G. soja*, and *G. max* in the field**

**Table S1. 16S rRNA read counts and number of identifiable units at different taxonomical levels**

| Sample | Raw_Tags | Final_Tags | OTUs | Phylum | Genus | Species |
|--------|----------|------------|------|--------|-------|---------|
| Gs1    | 9024     | 2449       | 181  | 1      | 7     | 35      |
| Gs2    | 6252     | 1433       | 210  | 3      | 18    | 53      |
| Gs3    | 7478     | 2213       | 184  | 1      | 6     | 32      |
| Sc1    | 5393     | 1524       | 157  | 1      | 2     | 11      |
| Sc2    | 3869     | 1086       | 150  | 1      | 2     | 11      |
| Sc3    | 5096     | 1365       | 156  | 1      | 2     | 11      |
| Gm1    | 11180    | 2707       | 264  | 2      | 9     | 31      |
| Gm2    | 4918     | 1015       | 207  | 2      | 12    | 44      |
| Gm3    | 5813     | 1342       | 179  | 2      | 13    | 43      |

**Table S2. Operational taxonomic units common to 75% of samples**

| OTU ID      | Genus/Species               | Gm1 | Gm2 | Gm3 | Gs1 | Gs2 | Gs3 | Sc1 | Sc2 | Sc3 |
|-------------|-----------------------------|-----|-----|-----|-----|-----|-----|-----|-----|-----|
| denovo1901  | <i>Ensifer</i>              | 9   | 1   | 1   | 0   | 19  | 0   | 45  | 28  | 33  |
| denovo8435  | <i>Ensifer</i>              | 4   | 1   | 0   | 0   | 10  | 1   | 13  | 7   | 8   |
| denovo10033 | <i>Ensifer</i>              | 32  | 13  | 1   | 0   | 40  | 1   | 103 | 86  | 104 |
| denovo11873 | <i>Ensifer/unidentified</i> | 14  | 5   | 2   | 6   | 10  | 5   | 2   | 0   | 0   |
| denovo12569 | <i>Ensifer/unidentified</i> | 29  | 13  | 4   | 0   | 45  | 3   | 67  | 29  | 29  |
| denovo12913 | <i>Ensifer/unidentified</i> | 7   | 2   | 1   | 0   | 10  | 0   | 1   | 2   | 2   |
| denovo13709 | <i>Ensifer</i>              | 7   | 2   | 0   | 0   | 6   | 1   | 10  | 9   | 11  |
| denovo16547 | <i>Ensifer</i>              | 43  | 13  | 0   | 0   | 97  | 3   | 121 | 100 | 122 |
| denovo20293 | <i>Ensifer/unidentified</i> | 36  | 11  | 1   | 0   | 36  | 2   | 79  | 49  | 97  |
| denovo20381 | <i>Ensifer/unidentified</i> | 45  | 15  | 23  | 82  | 9   | 66  | 0   | 0   | 1   |
| denovo25011 | <i>Ensifer</i>              | 22  | 8   | 0   | 0   | 39  | 1   | 84  | 59  | 101 |
| denovo26571 | <i>Ensifer</i>              | 2   | 1   | 0   | 0   | 1   | 1   | 4   | 7   | 6   |
| denovo27243 | <i>Ensifer</i>              | 6   | 3   | 1   | 0   | 11  | 0   | 9   | 10  | 8   |
| denovo29807 | <i>Ensifer/unidentified</i> | 16  | 7   | 8   | 6   | 9   | 11  | 2   | 2   | 2   |
| denovo33526 | <i>Ensifer/unidentified</i> | 517 | 246 | 399 | 680 | 236 | 637 | 9   | 5   | 2   |
| denovo35463 | <i>Ensifer/unidentified</i> | 27  | 6   | 1   | 2   | 42  | 3   | 0   | 1   | 5   |
